# Supplementary material
Source: PubMed Central journal article supplement (PMC5698106)
Supplement: NIHMS909808-supplement-1.pdf [file NIHMS909808-supplement-1.pdf]

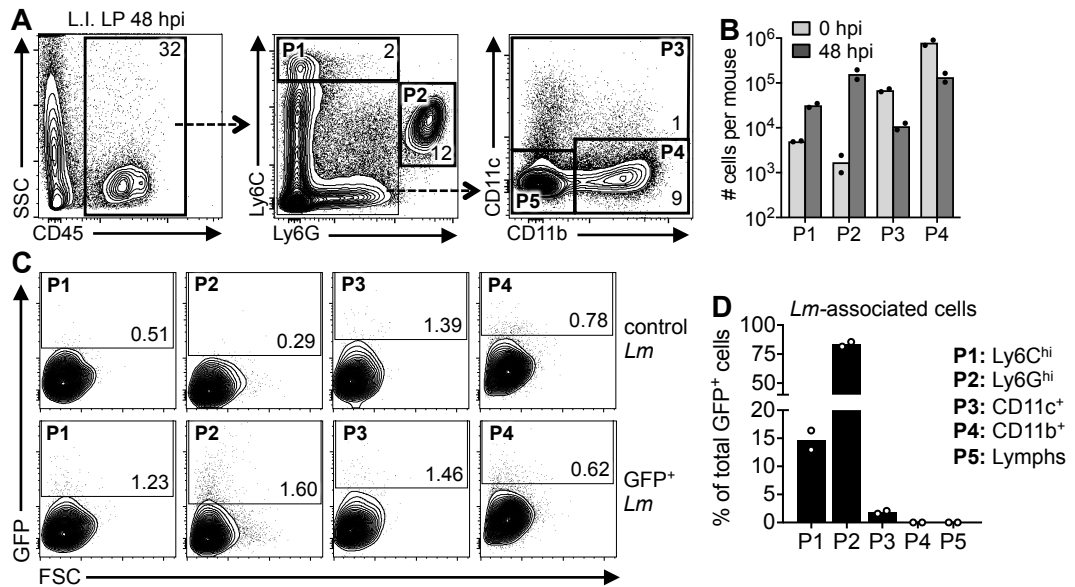

**FIGURE S1.** CD11c<sup>+</sup> cells are a minor proportion of *L. monocytogenes*-associated cells in the intestinal lamina propria. BALB mice were fed  $5 \times 10^8$  CFU of either *Lm* SD2710 (GFP<sup>+</sup>) or *Lm* SD2001 (vector control strain). **(A)** Gating scheme used to identify cell populations from the large intestine LP 48 hpi including P1 (Ly6C<sup>hi</sup>), P2 (Ly6G<sup>hi</sup> neutrophils), P3 (CD11c<sup>+</sup>), P4 (CD11b<sup>+</sup>CD11c<sup>-/+</sup>), and P5 (remaining cells, mainly lymphocytes). **(B)** Total number of cells in each population isolated from the large intestine LP of each mouse 48 hpi (n=2). **(C)** Representative dot plots show how GFP fluorescence was gated; percentage of FL-1+ cells from mice fed GFP<sup>neg</sup> *L. monocytogenes* were subtracted from values obtained for mice infected with GFP<sup>+</sup> *Listeria*. **(D)** Proportion of total GFP<sup>+</sup> (*Lm*-associated) cells in each population.

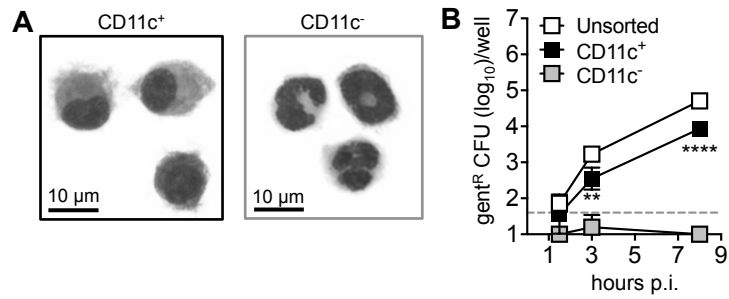

**FIGURE S2.** Only the CD11c<sup>+</sup> cells in GM-CSF-induced cultures support growth of *L. monocytogenes*. **(A)** Diff-Quik staining of CD11c<sup>neg</sup> and CD11c<sup>+</sup> cells sorted on day 8 of culture and incubated overnight in low attachment dishes. **(B)** Intracellular growth assay showing mean values ( $\pm$ SD) for triplicate samples. Statistical significance was determined using unpaired t tests (CD11c<sup>+</sup> vs. CD11c<sup>neg</sup> cells).
